1 **Evolution of reproductive traits have no apparent life-history associated cost in**  
2 **populations of *Drosophila melanogaster* selected for cold shock resistance**

3 Karan Singh<sup>a\*</sup> and Nagaraj Guru Prasad<sup>e</sup>

4

5

6 <sup>a</sup>Current Affiliations: NYU Langone Health, 650 Medical Science Building

7 550 First Ave, New York, NY 10016

8 E-mail: [karan.iiser@gmail.com](mailto:karan.iiser@gmail.com)

9 Phone+1-267-881-3908

10

11 <sup>a</sup>Previous Affiliations: Indian Institute of Science Education and Research Mohali,

12 Knowledge City, Sector 81, SAS Nagar, PO Manauli, Punjab 140306, India

13 Ph: 91 172 2240266, 2240124

14 Fax: 91 172 2240266, 2240124

15 E-mail: [karan.iiser@gmail.com](mailto:karan.iiser@gmail.com)

16

17

18 <sup>b</sup>Affiliations:

19 Indian Institute of Science Education and Research Mohali,

20 Knowledge City, Sector 81, SAS Nagar, PO Manauli, Punjab 140306, India

21 Ph: 91 172 2240266, 2240124

22 Fax: 91 172 2240266, 2240124

23 E-mail: [prasad@iisermohali.ac.in](mailto:prasad@iisermohali.ac.in)

24

25 \*Corresponding author

26

27 **Keywords:** Reproductive traits, life-history evolution, trade-off, life time fecundity, egg  
28 viability and mating number

29

30 **Abstract**

31 In insect species like *Drosophila melanogaster*, the ability to evolve greater resistance or  
32 evolution of certain traits under specific environmental conditions leads to energy trade-offs  
33 with other important life-history traits. A number of studies from multiple fields have  
34 documented the life-history associated cost. However, no known studies have assessed the  
35 life-history associated cost with evolved reproductive traits and increase egg viability in cold  
36 shock selected population. To explore this, we used replicate populations of *D. melanogaster*  
37 that have evolved reproductive traits and egg viability in response to increased resistance to  
38 non lethal cold shock. To assess life-history cost; we measured longevity, life time fecundity,  
39 Larvae to adults development time, and larvae to adults survival. We found that there were no  
40 significant differences in longevity, life time fecundity, larvae to adults survival, and male  
41 body weight between the selected and control populations. However, selected populations  
42 have significantly longer pre adults developmental time compared to their control population.  
43 Females from the selected populations were bigger in size compared to the control  
44 populations. These findings suggest that there is no life-history cost associated with the  
45 evolution of greater resistance in the aspect of faster recovery of egg viability and  
46 reproductive traits post cold-shock. It quite possible the cost of the evolution of reproductive  
47 traits and egg viability in response to cold shock resistant is paid in terms of reduced  
48 resistance to other stresses

49

50 **INTRODUCTION**

51 A number of ecological factors including temperature are known to vary across time and  
52 space and as a result, organisms experience different types of unfavorable environmental  
53 conditions during their lifespan. These environmental stresses can be major drivers of  
54 evolution of life-history of organisms in nature (Hoffman and Parsons, 1991, reviewed in  
55 Parsons, 2005).

56

57 Temperature is one of the fundamental ecological features of an organism's environment.  
58 Organisms can respond to extreme temperatures in various ways, like changes in their  
59 behavior patterns and physiology or life-history traits (Hoffmann and Parsons, 1991,  
60 Patton and Krebs, 2001, Fasolo and Krebs, 2004). Resources used for coping with stress  
61 are unavailable for other functions under limited resource conditions, which can lead to  
62 trade-offs across important life-history traits such as somatic maintenance and  
63 reproduction (Stearns, 1992). For example, one important way in which organisms cope  
64 with immediate changes in temperature (heat-shock and cold-shock) is by expressing  
65 heat shock proteins (HSPs). Expression of these proteins is extremely costly and is  
66 known to affect reproduction (Krebs and Loeschcke, 1994). Thus, temperature shock can  
67 affect various important life-history traits (Huey and Berrigan, 2001, Hochachka and  
68 Somero, 2002, Sinclair et al., 2003, Angilletta, 2009). Deviation from ambient temperature  
69 (where absolute fitness of an organism is maximum) drastically affects various life-history  
70 and related traits of insects (Lee and Denlinger, 1991, Voituron et al., 2002, Hoffmann et al.,  
71 2003) such as fecundity, male fertility, lifespan (Denlinger and Yocum, 1998, Bublly and  
72 Loeschcke, 2005, Rohmer et al, 2004, reviewed in Hance, 2007, Lieshout et al., 2013,  
73 Nguyen et al., 2013, Singh et al., 2016), reproduction (Singh et al., 2016, Singh and Prasad,  
74 2016), mating ability (Singh et al., 2015), development time (Trotta et al., 2006, Austin and  
75 Moehring, 2013) and motility (Angilletta et al., 2002)

76

77 Several studies have investigated the evolution of life-history traits in response to thermal  
78 variation. *D. melanogaster* being widely distributed offers a great model to study the  
79 evolution of life-history traits in response to temperature variation across latitudes and  
80 altitudes. In general, a number of traits vary progressively across populations inhabiting  
81 various latitudes. This pattern of results suggests that life-history evolution in populations of  
82 *Drosophila* is primarily being driven by environmental differences and that the populations  
83 are adapting to local environment, most probably, including temperature, which is an  
84 important component of the environment. Latitudinal clines have been found in a number of  
85 life-history traits such as development time, survivorship, larval competitive ability,  
86 fecundity and body size (Stanley and Parsons, 1981, Bouletreau-Merle et al., 1982, James and  
87 Partridge, 1995, 1998, reviewed in Hoffmann et al., 2003, Hangartner et al., 2015).

88

89 Some experimental evolution studies have investigated the evolution of life-history traits in  
90 response to selection for cold stress tolerance (Tucic, 1979, Chen and Walker, 1993, Watson  
91 and Hoffmann, 1996, Anderson et al., 2005, Bublly and Loeschcke 2005, MacMillan et al.,  
92 2009). However, such studies are a few (Overgaard et al., 2010). Anderson et al. (2005)  
93 found increased female fecundity and decreased male longevity in populations of *D.*  
94 *melanogaster* selected for rapid chill-coma recovery. MacMillan et al. (2009) also  
95 documented reduced longevity in females (but not in males) in populations selected for  
96 increased resistance to freeze shock. However, Bublly and Loeschcke (2005) did not notice  
97 any difference in longevity and development time in populations of *D. melanogaster* selected  
98 for increased cold tolerance. Thus, the correlated evolution of life-history traits in response to  
99 cold stress has been fairly variable.

100

101 In this study, our aim in probing the life-history costs, if any, of increased resistance to cold  
102 stress in terms of increased reproductive traits and egg viability (Singh et al., 2015, Singh et  
103 al. 2016, Singh and Prasad 2016) in populations of *D. melanogaster* selected for cold shock  
104 resistance. To investigate the underlying life-history cost to increased resistance to cold  
105 stress, we assayed various life-history (longevity and life time fecundity) and related traits  
106 such as development time, and body weight in the populations of *D. melanogaster* selected  
107 for increased resistance to cold stress. These experiments were performed over 24-33  
108 generations of selection.

109

110

## 111 **MATERIALS AND METHODS:**

112

### 113 **Experimental populations:**

114 Details of the maintenance and derivation of the selected (FSB; Cold shock Selected  
115 population derived from BRB population) and their control (FCB; Cold shock Control  
116 derived from BRB population) populations has been explained previously (Singh et al. 2015).  
117 Briefly, after 35 generation of the laboratory adaption of BRB 1-5, one FSB population and  
118 one FCB population were established from each of the BRB populations, for example, FSB 1  
119 and their corresponding control FCB 1 derived from the BRB 1, similarly FSB 2 and their  
120 control FCB 2 established from the BRB2 and so on. Hence, we had five replicate  
121 populations for the selected population and five replicate of control populations. Populations  
122 carrying the same numerical subscript have originated from same base line population (BRB)  
123 and are more close to each other than any other populations. For instance, FSB 1 and FCB 1  
124 are more close (due to the origin from the same ancestral population) to each other than FSB  
125 2 or FCB 2 or any other population. Hence, in our statistical data analysis FSB 1 and FCB 1

126 are included in block 1, similarly FSB 2 and FCB 2 are included in block 2 and so on. FSB  
127 and FCB populations are large outbred populations maintained under standard laboratory  
128 environment (25°C temperature, 50–60% relative humidity, 12 hour light: 12 hour dark cycle,  
129 on a 13-day discrete generation cycle). On day 12 post egg collection, flies (flies are roughly  
130 2-3 days old as adults and mated) are moved into empty, clean, dry glass vials (30 mm  
131 diameter × 90 mm length). After that flies belonging to the FSB populations are subjected to -  
132 5°C temperature in ice-salt-water slurry for one hour. FCB populations, on the other hand, are  
133 held at 25°C for one hour. Subsequently, all populations are quickly moved into a separate  
134 Plexiglass cage (25 cm length × 20 cm width × 15 cm height) having a fresh food plate. After  
135 24 hour a fresh food plate is given to flies in order to collect eggs to initiate next generation.  
136 For each population, 20 vials are collected at density of 70 eggs per vial containing ~ 6 ml of  
137 a fresh food.

138

139

#### 140 **Standardization**

141 To account the non-genetic parental effects (Rose 1984), flies from the selected populations  
142 and from their controls were reared for one generation in common rearing environment. This  
143 method is referred to as standardization and these flies are known as standardized flies. A  
144 detail of the standardization of the protocol has been described earlier in Singh et al. (2015).  
145 Shortly, to control eggs density, for each selected and their control populations, 20 vials were  
146 established at density of 70 eggs per vials in ~6 ml food, reared at standard laboratory  
147 conditions (12 hours light:12 hours dark). On day 12 after egg collection, (roughly 2-3 days  
148 old as adult flies) ~ 1200-1400 flies of each population were transferred separately in a  
149 Plexiglass cage and provided a fresh food plate. These flies were further used for experiment  
150 egg collection.

151

## 152 **Cold shock treatment for experiments**

153 Detailed account of the cold shock protocol has been described in our previous study (Singh  
154 et al., 2015). In short, on day 12 post egg collection, (by this time flies were roughly 2-3 days  
155 old as adult and mated flies) 25 pairs of males and females were moved to clean, dry glass  
156 vials under mild carbon dioxide anesthesia. The cotton plug was inserted deep into the vial  
157 such that the flies were allowed to stay in a confined space in vial (1/3 of the vial). The flies  
158 were kept in an incubator to recover from carbon dioxide anesthesia for half an hour. The  
159 vials containing flies were then kept for one hour in ice-salt-water slurry maintained at -5°C.  
160 Post cold shock, flies were quickly shifted to Plexiglass cages (14 cm length × 16 cm width ×  
161 13 cm height. The cage was provided with a food Plate and was kept under standard  
162 laboratory conditions (Singh et al., 2015). The control treatment flies were handled similar  
163 way, except that the vials containing flies, were kept in a water bath that maintained at 25°C  
164 for one hour.

165

## 166 **Experimental details**

### 167 **Experiment: 1.1: Longevity assay**

168 The longevity assay was performed after 24 generations of selection. Eggs were collected  
169 from standardized flies at a controlled egg density of 70 eggs/vial provisioned with ~ 6 ml of  
170 fresh banana-yeast-jaggery food (hereafter referred to as “food”). Twenty four such type of  
171 vials were set up for each of the FSB (1-5) and FCB (1-5) populations. On day 12 after egg  
172 collection, flies were sorted (25 mating pairs per vial) under mild carbon dioxide anesthesia.  
173 After sorting, flies were divided into two sets: (a) set first for cold-shock treatment (both male  
174 and female flies were exposed to cold shock for one hour) and (b) set second for no-shock  
175 treatment (neither males and nor females were exposed to cold-shock).

176

177 **(a) Cold-shock:** For each population, flies contained in 12 vials (each vial contains 25  
178 mating pairs of male and female) were imposed cold-shock ( $-5^{\circ}\text{C}$  for one hour) as mentioned  
179 in the cold shock protocol. Quickly, after the cold shock, 12 vials were randomly divided into  
180 3 sets referred to as a “replicate”. Each set having 4 vials of flies (100 mating pairs each)  
181 were moved into a Plexiglass cage and given a fresh food plate. Hence, each population (FSB  
182 1-5 and FCB 1-5) had 3 replicates.

183

184 **(b) No-shock:** For each population, flies contained in 12 vials (each vial contain 25 mating  
185 pairs of male and female) were subjected to no-shock treatment ( $25^{\circ}\text{C}$  for one hour). Post  
186 treatment, 12 vials were quickly randomly divided into three sets that were known as  
187 replicate. Each set having 4 vials containing total of 100 mating pairs of male and female  
188 flies were moved into Plexiglas cages and given a fresh food plate. Hence, each population  
189 (FSB 1-5 and FCB 1-5) had 3 replicates.

190

191 We established three replicate cages per selection  $\times$  block  $\times$  treatment combination (Except  
192 block 1 of the FCB population which had 2 replicates for both-shock treatment, due to  
193 accidental death of one of the replicates during the assay). Food plate was changed 48 hours  
194 internal and dead flies were aspirated out and computed. Sex of the dead flies was determined  
195 under microscope on the basis of sex combs. Mortality was recorded until the last fly died.  
196 Using the mortality data, for each cage, we measured mean longevity of males and females  
197 from the selection regime (FSB and FCB), treatment and block. For the analysis of mean  
198 longevity, cage means were used as the unit of analysis.

199

## 200 **Experiment 1.2: Life time fecundity assay**

201 Fecundity assay was performed along with longevity assay, using the same set of flies. We  
202 measured fecundity at every sixth day along with longevity. In order to measure fecundity,



203 fresh food plate was placed in the Plexiglas cage for 6 hours for oviposition. After that, total  
204 number of eggs on each plate was counted under the microscope. Subsequently, fecundity per  
205 female - number of eggs divided by total number of live females at that time point- was  
206 calculated. Average fecundity of the eleven time points was calculated for three replicates for  
207 each of the FSB 1-5 and FCB 1-5 populations, and treatments. We also computed median and  
208 maximum longevity for each cage populations. The aging rate data was analyzed using the  
209 Gompertz model.

210

### 211 **Experiment 2: Development time (first instar larva to eclosion)**

212 Development time was assayed after 33 generations of selection. Followed by one generation  
213 of common rearing environment or standard laboratory condition (no selection was imposed  
214 on FSB and FCB population), 12 vials each were set up for FSB 1-5 and FCB 1-5  
215 populations at a density of 70 eggs per vial. On day 12 after egg collection, vials containing  
216 flies were randomly divided into two sets for - (a) cold-shock (b) no-shock treatment. For  
217 both 'cold-shock' and 'no-shock' treatments, flies were transferred into empty glass vials at  
218 density of ~70 flies and the cotton plug was pushed deep up to the bottom one-third of the  
219 vial. After that, the flies were subjected to cold shock or no shock treatments, following the  
220 protocol as mentioned above. Immediately after cold-shock treatment, flies (200 males and  
221 200 females) were transferred to Plexiglass cage and provided with a fresh food plate.  
222 Twenty four hours post cold-shock, fresh - food plates were given to each cage for 1 hour to  
223 lay stored eggs. After that another set of fresh plates were given for four hours. The second  
224 set of plates containing eggs were then incubated at standard laboratory conditions for 18  
225 hours to allow eggs to hatch and first instars larvae to emerge. The larvae were collected  
226 (using a moist brush) into vials with 6 ml of a fresh food. For each population and treatment  
227 combination, 10 replicate vials were set up (each containing 30 larvae in 6 ml of food). The  
228 vials were incubated at standard laboratory conditions. The positions of the vials were

229 randomized and moved daily within the incubator. Once pupae formed, each vial was  
230 manually scanned every 2 hours. Freshly eclosed flies were transferred into empty glass vials,  
231 sexed and counted. The flies were then flash frozen using liquid nitrogen and then transferred  
232 to -80°C for storage used to assess dry body weight.. Mean larva to eclosion development  
233 time was computed for each vial and this vial mean time was considered as the unit of  
234 analysis.

235

### 236 **Experiment 3: Measurement of dry body weight of male and female flies**

237 In order to measure the dry body weight, we used the same flies from the development time  
238 assay (mentioned above). Freshly eclosed flies were flash frozen using liquid nitrogen and  
239 stored at -80°C until dry body weight measurement. Five flies of a given sex were grouped  
240 together, dried in a hot air oven at 65°C for 48 hours and weighed. For each population,  
241 treatment and sex combination, ten such sets were weighed. Thus, a total of 50 males and 50  
242 females per population and treatment were used for body weight measurement. Body weight  
243 of each group of five flies was considered as the unit of analysis.

244

### 245 **Experiment 4: Larvae to adults survival:**

246 To investigate larvae to adults survival, we monitored total number of flies eclosed from the  
247 cultured larval vial at density of 30 larvae/vial. We calculated percentage of larvae to adult  
248 survival using the equation in given a bracket (percentage of larvae to adults survival =  
249 (number of eclosed flies in a vial/total number of larvae cultured in a vial )\*100).

250

### 251 **Statistical analysis**

252 Mean longevity, development time, dry body weight of males and females, and larvae to  
253 adults survival were analyzed using a three-factor mixed model analysis of variance  
254 (ANOVA) treating selection regime (FSB vs. FCB), treatment (cold-shock vs. no-shock) as a  
255 fixed factors crossed with a random block (1-5). The sexes were analyzed separately.

256 Fecundity per female was analyzed using a three-factor mixed model ANOVA treating  
257 selection regime (FSB vs. FCB) and treatment (cold-shock vs. no-shock) as fixed factors  
258 crossed with block as a random factor. All the analyses were done at  $\alpha=0.05$  level of  
259 significance using Statistica (for Windows, version 10, Statsoft). Multiple comparisons were  
260 carried out employing Tukey's HSD.

261

### 262 **Rates of aging**

263 Age dependent and age independent rate of aging was measured using the method used by  
264 Mueller et al. (1995) and Jafari et al. (2007). Raw survivorship data were used to calculate  
265 'proportion survival' values with subsequent calculation of running average of the proportion  
266 survival data,  $r_x$ .

$$267 \quad r_x = (p_x + p_{x+2})/2 \quad (1)$$

268 Where,  $p_x$  is the proportion of individuals surviving at a given age  $x$ . Since mortality was  
269 monitored every alternate day,  $x$  and  $x+2$  are two successive age intervals noticed. The  
270 hazard rate that is the probability of death per unit time,  $\mu_x$  at age  $x$  was computed employing  
271 the following equation:

$$272 \quad \mu_x = (r_x - r_{x+2})/r_x \quad (2)$$

273 According to the Gompertz equation, the mortality rate at age  $x$  is given by,

$$274 \quad \mu_x = ae^{bx} \quad (3)$$

275 Where,  $a$  and  $b$  represent age-independent and age-dependent rate of aging respectively. Log-  
276 hazard rate was regressed against age intervals; the intercept and the least square slope gave  
277 the estimates of *Gompertz a* and *Gompertz b* respectively. The derived parameters were  
278 analyzed using three factor mixed model ANOVA with selection regime (FSB vs. FCB),  
279 treatment (cold shock vs. no shock) as fixed factor crossed with random blocks (1-5).

280

281

282

283 **RESULTS**

284

285 **Experiment 1.1: Longevity assay for male and female**

286 Male and female longevity was assessed in terms of mean, median and maximum longevity.

287 Analyses revealed that the results were similar regardless of the measure used. After 24

288 generations of selection, there was no significant effect of selection, treatment or selection  $\times$

289 treatment interaction on male or female mean longevity (Table 1a, b Figure 1a, b, c, and d).

290 Interestingly, the absence of any significant effect of treatment indicated that flies subjected

291 to cold-shock treatment as well as the flies that were not subjected to cold-shock, which

292 proved that cold shock had no direct effect on mean longevity.

293

294 We found a significant effect of treatment on the *Gompertz a* (age independent mortality rate)

295 and *b* (age dependent mortality rate) parameters among males. The FSB and FCB males

296 subjected to cold-shock showed significantly higher age independent mortality but a

297 significantly lower age dependent mortality compared to the males not subjected to cold-

298 shock (Table 1c). The net effect of these two factors was that the average (and median)

299 lifespan of the males subjected to cold-shock and those not subjected to cold-shock was not

300 different. There was no effect of selection or a selection  $\times$  treatment interaction on the

301 Gompertz parameters. Among the females, none of the factors affected the Gompertz

302 parameters (Table 1d). Thus, we found no evidence for any significant change in mean

303 longevity or rates of aging as a correlated response to selection for increased resistance to

304 cold-shock.

305

306 **Experiment 1.2: Life time fecundity**

307 The mean number of eggs laid per female in each of the FSB and FCB populations and

308 treatments were computed by averaging across the 11 time points of fecundity measurement

309 and used it as the unit of analysis. We did not observe significant effects of selection,

310 treatment or selection  $\times$  treatment interaction on female fecundity (Table 2, Figure 2a, and  
311 2b). Just like longevity, the absence of any significant effect of treatment on fecundity  
312 revealed that cold-shock treatment had no direct effect on lifetime fecundity.

313

#### 314 **Experiment 2: Development time (first instar larva to adult eclosion)**

315 Unlike longevity and fecundity, selection did affect mean development time. Mean  
316 development time of males showed a significant effect of selection. (Table 3a, Figure 3a).  
317 Starting as first instar larvae, FSB male took about 2-4 hours more to emerge as adults  
318 compared to FCB males (Figure 3a). Female mean development time analysis showed that  
319 there was significant effect of selection (Table 3b, Figure3b). However, none of the other  
320 effects were significant. Just like the males, FSB females also took~3-6 hours more to emerge  
321 as adults compared to FCB females (Figure3b). Again, the cold shock experienced by the  
322 parents had no effect on offspring development time (no significant treatment effect).

323

#### 324 **Experiment 3: Dry body weight**

325 Male mean dry body weight analysis revealed that there was no significant effect of selection,  
326 treatment or selection  $\times$  treatment interaction (Table 4a, Figure 4a). In case of female dry  
327 body weight, found significant main effect of selection (Table 4b). However, there was no  
328 significant effect of treatment or selection  $\times$  treatment interaction (Table 4b). Mean body  
329 weight of FSB females was about ~0.01 mg higher than that of FCB females (Figure 4b).

330

#### 331 **Experiment 4: larvae to adults survival**

332 Mean larvae to adult survivals analysis shown that there was no significant effect of selection  
333 or selection  $\times$  treatment interaction (Table 5, Figure 5).

334

335

336

#### 337 **DISCUSSION**

338 In this study, we assessed mean longevity, rates of aging, developmental time and dry body  
339 weight in the FSB and FCB populations with and without cold shock. Neither longevity nor  
340 fecundity was different between the FSB and FCB populations. However, we found that  
341 males and females from the FSB populations took significantly more time to develop (from  
342 first instar larvae to adult) relative to the FCB populations. Females from the FSB  
343 populations were heavier than females from the FCB populations. However, there was no  
344 difference in male body size between the FSB and FCB populations. Taken together, our  
345 finding suggests there is no evidence for a trade-off between the ability to resist cold stress  
346 and important life-history traits.

347

348 The correlation between cold-shock resistance and longevity is variable across studies.  
349 MacMillan et al. (2009), using a selection protocol very similar to the present study found  
350 that females of the cold-shock selected populations had decreased longevity compared to  
351 females of the control populations whereas no such difference was visible in the males.  
352 According to Anderson et al. (2005) populations selected for faster chill-coma recovery had  
353 reduced lifespan compared to controls. In the contrary Norry and Loeschcke (2002) observed  
354 that cold adapted populations lived longer at 14°C and shorter at 25°C compared to control  
355 populations. Bublly and Loeschcke (2005) found no change in female longevity between  
356 populations selected for cold resistance and their controls. In populations directly selected for  
357 increased lifespan, increased cold resistance evolved as a correlated response in adults and  
358 pupae of *D. melanogaster* (Luckinbill, 1998). In contrast to all these studies, we found that  
359 selection for resistance to cold-shock had no effect on lifespan or rates of aging. There were  
360 several possible differences including the base population used for selection, the definition of  
361 ‘cold stress’, the assay protocols, *etc.* between these studies that preclude a direct comparison  
362 of results. More importantly, other studies, typically selected for increased survivorship post

363 cold-shock. However, in our study there was very little cold induced mortality. This is further  
364 strengthened by the fact that the lifespan of the FSB and FCB populations that were subjected  
365 to cold-shock were not different from the longevity of those populations not subjected to cold  
366 shock. Thus, it is not surprising that longevity did not evolve in the FSB compared to FCB  
367 populations.

368

369 In several previous studies, fecundity has responded to selection for cold resistance.  
370 Anderson et al. (2005) found that at least two of the three replicates in their selection regime  
371 evolved lower fecundity. Watson and Hoffmann (1996) found that cold selected populations  
372 had lower fecundity. However, we found no difference in the life-time fecundity of in the  
373 FSB relative to the FCB populations. This is in agreement with our earlier, short-term  
374 measurement of fecundity in these two populations (Singh et al., 2015). Thus, we found no  
375 evidence of a trade-off between evolved cold stress resistance and fecundity.

376

377 Increased development time can potentially be a cost in species like *D. melanogaster* that  
378 inhabit ephemeral habitats and have to complete their development before the habitat  
379 disappears. We did find that the FSB males and females had increased developmental time.  
380 However, the magnitude of the increase was very small (~3-4 hours) and hence we are not  
381 sure whether this represented a cost. Increased development time represented an adaptation to  
382 increase resource storage that helped in coping stressful conditions. During the late third  
383 larval instar stage, *D. melanogaster* larvae feed rapidly and increased their weight  
384 exponentially (reviewed in Prasad and Joshi, 2003). An increase of ~3-4 hours of feeding  
385 time during this period drastically increased the amount of resources stored by the larvae.  
386 Accordingly, populations of *D. melanogaster* selected for increased starvation and  
387 desiccation stress resistance are known to show increased development time and increased

388 body size (Chippindale et al., 1996, 1998). In this study, increased development time  
389 represented an adaptation to acquire necessary resources to cope with cold stress.

390

391 Body weight at eclosion is often used as a proxy for the amount of resources stored by the  
392 larvae. Anderson et al., (2005) and Watson and Hoffmann (1996) found no difference in body  
393 size of flies selected for increased cold resistance. In this study, FSB females were heavier at  
394 eclosion compared to FCB females. This indicated that FSB females were storing  
395 extra/specific nutrients to survive cold-shock. However, there was no difference in body  
396 weight between FSB and FCB males. Taken together, this indicated that at least in females,  
397 increased development time was likely to be beneficial in aspect of increased resource  
398 acquisition. It is also to be noted that in our previous study, females suffered more mortality  
399 post cold shock relative to males (Singh et al., 2015).

400

401 Absence of any change in lifespan and fecundity of the FSB populations could be because of  
402 many reasons. Firstly, the evolved cold-shock resistance ability of the FSB populations might  
403 be very cheap. Thus, the resources required to combat the effects of cold stress in our  
404 selection regime might be very low. It is a known fact that the flies in our population need to  
405 produce active gametes and mate in order to increase egg viability post cold shock.  
406 Accordingly, the FSB populations mate more often than the FCB populations post cold-shock  
407 (Singh et al., 2015, 2016, Singh and Prasad, 2016). Courtship and mating carry a substantial  
408 cost to both males and females (Wedell, 2010). Thus, the costs of evolved cold-shock  
409 resistance are expected to be substantial in our selection regime. A second alternative is that  
410 the resources are abundant and the FSB populations are able to acquire them as adults. The  
411 food used in our selection regime was indeed rich. The larval and adult densities were low.  
412 Therefore, it was possible that our flies inhabited resource-rich environment. If this is true,



413 then assays under resource depleted condition should lead to different results. Finally, it is  
414 quite possible that the cost of increased cold resistance is paid in a different currency. While  
415 we did not find any difference in adult longevity or fecundity, other traits that we have not  
416 measured here might have been reduced in the FSB populations. The possible set of such  
417 traits include starvation and desiccation resistance.

418

## 419 **CONCLUSIONS**

420

421 Our findings revealed that there is no life-history trade-offs between increased resistance to  
422 cold-shock (in aspect of increased reproductive traits and egg viability post cold shock) with  
423 life history traits i.e. the longevity, life time fecundity, larvae to adults survival, and larvae to  
424 pre adults developmental time, which indicated that evolved cold stress resistance need not  
425 come at a cost of life-history traits. It is quite possible that the cost of increased cold stress  
426 resistance is paid in terms of reduced resistance to other stresses.

427

## 428 **Conflict of Interest**

429 **All the authors declare “No Conflict of Interest”**

430

431

432

433

434

435

436

437

438

439

440

441

## 442 **References**

443 Hoffmann, A.A. and Parsons, P.A., 1991. *Evolutionary genetics and environmental stress.*

444 Oxford University Press.

- 445 Parsons, P.A., 2005. Environments and evolution: interactions between stress, resource  
446 inadequacy and energetic efficiency. *Biological Reviews*, 80(4), pp.589-610.
- 447 Patton, Z.J. and Krebs, R.A., 2001. The effect of thermal stress on the mating behavior of  
448 three *Drosophila* species. *Physiological and Biochemical Zoology*, 74(6), pp.783-788.
- 449 Fasolo, A.G. and Krebs, R.A., 2004. A comparison of behavioural change in *Drosophila*  
450 during exposure to thermal stress. *Biological Journal of the Linnean Society*, 83(2),  
451 pp.197-205.
- 452 Stearns, S.C., Oxford: Oxford University Press; 1992. *The evolution of life histories*, 264.
- 453 Krebs, R.A. and Loeschcke, V., 1994. Effects of exposure to short-term heat stress on  
454 fitness components in *Drosophila melanogaster*. *Journal of Evolutionary*  
455 *Biology*, 7(1), pp.39-49.
- 456 Huey, R.B. and Berrigan, D., 2001. Temperature, demography, and ectotherm fitness. *The*  
457 *American Naturalist*, 158(2), pp.204-210.
- 458 Hochachka, P.W. and Somero, G.N., 2002. *Biochemical adaptation: mechanism and process*  
459 *in physiological evolution*. Oxford University Press.
- 460 Angilletta Jr, M.J. and Angilletta, M.J., 2009. *Thermal adaptation: a theoretical and*  
461 *empirical synthesis*. Oxford University Press.
- 462 Lee, R.E., 1991. Principles of insect low temperature tolerance. In *Insects at low*  
463 *temperature* (pp. 17-46). Springer, Boston, MA. Voituron, Y., Mouquet, N., de  
464 Mazancourt, C. and Clobert, J., 2002. To freeze or not to freeze? An evolutionary

465 perspective on the cold-hardiness strategies of overwintering ectotherms. *The*  
466 *American Naturalist*, 160(2), pp.255-270.

467 Hoffmann, A.A., Sørensen, J.G. and Loeschcke, V., 2003. Adaptation of *Drosophila* to  
468 temperature extremes: bringing together quantitative and molecular  
469 approaches. *Journal of thermal Biology*, 28(3), pp.175-216.

470 Denlinger, D.L., Yocum, G.D. and Hallman, G.J., 1998. Thermal sensitivity in insects and  
471 application in integrated pest management. *Physiology of heat sensitivity*, pp.11-18.

472 Bublly, O.A. and Loeschcke, V., 2005. Correlated responses to selection for stress resistance  
473 and longevity in a laboratory population of *Drosophila melanogaster*. *Journal of*  
474 *evolutionary biology*, 18(4), pp.789-803.

475 Rohmer, C., David, J.R., Moreteau, B. and Joly, D., 2004. Heat induced male sterility in  
476 *Drosophila melanogaster*: adaptive genetic variations among geographic populations  
477 and role of the Y chromosome. *Journal of Experimental Biology*, 207(16), pp.2735-  
478 2743.

479 Hance, T., van Baaren, J., Vernon, P. and Boivin, G., 2007. Impact of extreme temperatures  
480 on parasitoids in a climate change perspective. *Annu. Rev. Entomol.*, 52, pp.107-126.

481 Van Lieshout, E., Tomkins, J.L. and Simmons, L.W., 2013. Heat stress but not inbreeding  
482 affects offensive sperm competitiveness in *Callosobruchus maculatus*. *Ecology and*  
483 *evolution*, 3(9), pp.2859-2866.

484 Nguyen, T.M., Bressac, C. and Chevrier, C., 2013. Heat stress affects male reproduction in a  
485 parasitoid wasp. *Journal of Insect Physiology*, 59(3), pp.248-254.

- 486 Singh, K., Samant, M.A., Tom, M.T. and Prasad, N.G., 2016. Evolution of pre-and post-  
487 copulatory traits in male *Drosophila melanogaster* as a correlated response to  
488 selection for resistance to cold stress. *PloS one*, *11*(4).
- 489 Singh, K. and Prasad, N.G., 2016. Evolution of pre-and post-copulatory traits in female  
490 *Drosophila melanogaster* as a correlated response to selection for resistance to cold  
491 stress. *Journal of insect physiology*, *91*, pp.26-33.
- 492 Singh, K., Kochar, E. and Prasad, N.G., 2015. Egg viability, mating frequency and male  
493 mating ability evolve in populations of *Drosophila melanogaster* selected for  
494 resistance to cold shock. *PloS one*, *10*(6).
- 495 Trotta, V., Calboli, F.C., Ziosi, M., Guerra, D., Pezzoli, M.C., David, J.R. and Cavicchi, S.,  
496 2006. Thermal plasticity in *Drosophila melanogaster*: a comparison of geographic  
497 populations. *BMC evolutionary biology*, *6*(1), p.67.
- 498 Austin, C.J. and Moehring, A.J., 2013. Optimal temperature range of a plastic species,  
499 *Drosophila simulans*. *Journal of animal ecology*, *82*(3), pp.663-672.
- 500 Angilletta MJ Jr, Niewiarowski PH, Navas CA. The evolution of thermal physiology in  
501 ectotherms. *J Therm Biol*. 2002; *27*: 249-268.
- 502 Stanley, S.M. and Parsons, P.A., 1981. The response of the cosmopolitan species, *Drosophila*  
503 *melanogaster*, to ecological gradients. In *Proc Ecol Soc Aust* (Vol. 11, pp. 121-130).
- 504 Boulétreau-Merle, J., Allemand, R., Cohet, Y. and David, J.R., 1982. Reproductive strategy  
505 in *Drosophila melanogaster*: significance of a genetic divergence between temperate  
506 and tropical populations. *Oecologia*, *53*(3), pp.323-329.

- 507 James, A.C. and Partridge, L., 1998. Geographic variation in competitive ability in  
508 *Drosophila melanogaster*. *The American Naturalist*, 151(6), pp.530-537.
- 509 James, A.C. and Partridge, L., 1995. Thermal evolution of rate of larval development in  
510 *Drosophila melanogaster* in laboratory and field populations. *Journal of Evolutionary*  
511 *Biology*, 8(3), pp.315-330.
- 512 Hangartner, S.B., Hoffmann, A.A., Smith, A. and Griffin, P.C., 2015. A collection of  
513 Australian *Drosophila* datasets on climate adaptation and species  
514 distributions. *Scientific data*, 2(1), pp.1-8.
- 515 Tucić, N., 1979. Genetic capacity for adaptation to cold resistance at different developmental  
516 stages of *Drosophila melanogaster*. *Evolution*, pp.350-358.
- 517 Chen, C.P. and Walker, V.K., 1993. Increase in cold shock tolerance by selection of cold  
518 resistant lines in *Drosophila melanogaster*. *Ecological Entomology*, 18(3), pp.184-  
519 190.
- 520 Watson, M.J. and Hoffmann, A.A., 1996. Acclimation, cross-generation effects, and the  
521 response to selection for increased cold resistance in *Drosophila*. *Evolution*, 50(3),  
522 pp.1182-1192.
- 523 Anderson, A.R., Hoffmann, A.A. and McKECHNIE, S.W., 2005. Response to selection for  
524 rapid chill-coma recovery in *Drosophila melanogaster*: physiology and life-history  
525 traits. *Genetics Research*, 85(1), pp.15-22.
- 526 Bublly, O.A. and Loeschke, V., 2005. Correlated responses to selection for stress resistance  
527 and longevity in a laboratory population of *Drosophila melanogaster*. *Journal of*  
528 *evolutionary biology*, 18(4), pp.789-803.

- 529 MacMillan, H.A., Walsh, J.P. and Sinclair, B.J., 2009. The effects of selection for cold  
530 tolerance on cross-tolerance to other environmental stressors in *Drosophila*  
531 *melanogaster*. *Insect Science*, 16(3), pp.263-276.
- 532 Overgaard, J., Sørensen, J.G. and Loeschcke, V., 2010. Genetic variability and evolution of  
533 cold-tolerance. In *Low temperature biology of insects* (pp. 276-296). Cambridge  
534 University Press.
- 535 Rose, M.R., 1984. Laboratory evolution of postponed senescence in *Drosophila*  
536 *melanogaster*. *Evolution*, 38(5), pp.1004-1010.
- 537 Mueller, L.D., Nusbaum, T.J. and Rose, M.R., 1995. The Gompertz equation as a predictive  
538 tool in demography. Jafari, M., Khodayari, B., Felgner, J., Bussel, I.I., Rose, M.R. and  
539 Mueller, L.D., 2007. Pioglitazone: an anti-diabetic compound with anti-aging  
540 properties. *Biogerontology*, 8(6), pp.639-651.
- 541 Norry, F.M. and Loeschcke, V.R., 2002. Longevity and resistance to cold stress in  
542 cold-stress selected lines and their controls in *Drosophila melanogaster*. *Journal of*  
543 *Evolutionary Biology*, 15(5), pp.775-783.
- 544 Luckinbill, L.S., 1998. Selection for longevity confers resistance to low-temperature stress in  
545 *Drosophila melanogaster*. *The Journals of Gerontology Series A: Biological Sciences*  
546 *and Medical Sciences*, 53(2), pp.B147-B153.
- 547 Prasad, N.G. and Joshi, A., 2003. What have two decades of laboratory life-history evolution  
548 studies on *Drosophila melanogaster* taught us?. *Journal of genetics*, 82(1-2), pp.45-76.
- 549 Chippindale, A.K., Chu, T.J. and Rose, M.R., 1996. Complex trade-offs and the evolution of  
550 starvation resistance in *Drosophila melanogaster*. *Evolution*, 50(2), pp.753-766.

551 Chippindale, A.K., Gibbs, A.G., Sheik, M., Yee, K.J., Djawdan, M., Bradley, T.J. and Rose,  
552 M.R., 1998. Resource acquisition and the evolution of stress resistance in *Drosophila*  
553 *melanogaster*. *Evolution*, 52(5), pp.1342-1352.

554 Wedell, N., 2010. Variation in male courtship costs in butterflies. *Behavioral ecology and*  
555 *sociobiology*, 64(9), pp.1385-1391.

556

557

558

559

560

561

562

563

564

565

566

567

568

569

570

571

572 **Table 1a.** Effect of cold-shock on the mean longevity of males (Experiment 1.1). Summary of  
573 results from a three-factor mixed model ANOVA on the male mean longevity using selection  
574 (FCB and FSB) and treatment (cold-shock and no-shock) as fixed factors crossed with  
575 random block (1-5).

576

| Effect          | SS     | MS Num | DF Num | DF Den | F ratio | p     |
|-----------------|--------|--------|--------|--------|---------|-------|
| Selection (Sel) | 33.439 | 33.439 | 1.000  | 4.006  | 1.348   | 0.310 |
| Treatment (Trt) | 14.549 | 14.549 | 1.000  | 4.008  | 0.752   | 0.435 |

|                 |         |         |       |        |       |       |
|-----------------|---------|---------|-------|--------|-------|-------|
| Block (Blk)     | 478.234 | 119.559 | 4.000 | 6.177  | 3.024 | 0.107 |
| Sel × Trt       | 9.169   | 9.169   | 1.000 | 4.032  | 1.972 | 0.232 |
| Sel × Blk       | 99.283  | 24.821  | 4.000 | 4.000  | 5.350 | 0.067 |
| Trt × Blk       | 77.398  | 19.349  | 4.000 | 4.000  | 4.170 | 0.098 |
| Sel × Trt × Blk | 18.559  | 4.640   | 4.000 | 39.000 | 0.422 | 0.792 |

577

578

579 **Table 1b.** Effect of cold-shock on the mean longevity of females (Experiment 1.1). Summary  
 580 of results from a three-factor mixed model ANOVA on the female mean longevity using  
 581 selection (FCB and FSB) and treatment (cold-shock and no-shock) as fixed factors crossed  
 582 with random block (1-5). *p*-values in bold are statistically significant.

583

| Effect          | SS      | MS Num | DF Num | DF Den | <i>F</i> ratio | <i>p</i>     |
|-----------------|---------|--------|--------|--------|----------------|--------------|
| Selection (Sel) | 56.044  | 56.044 | 1.000  | 4.007  | 2.756          | 0.172        |
| Treatment (Trt) | 1.581   | 1.581  | 1.000  | 4.004  | 0.047          | 0.839        |
| Block (Blk)     | 91.967  | 22.992 | 4.000  | 7.012  | 0.443          | 0.775        |
| Sel × Trt       | 0.160   | 0.160  | 1.000  | 4.071  | 0.084          | 0.786        |
| Sel × Blk       | 81.399  | 20.350 | 4.000  | 4.000  | 10.751         | <b>0.020</b> |
| Trt × Blk       | 133.984 | 33.496 | 4.000  | 4.000  | 17.697         | <b>0.008</b> |
| Sel × Trt × Blk | 7.571   | 1.893  | 4.000  | 39.000 | 0.192          | 0.941        |

584

585

586

587

588 **Table 1c.** Effect of cold shock on the age independent and age dependent mortality rates of  
 589 males (Experiment 1.1). Summary of results from a three-factor mixed model ANOVA on (a)  
 590 age independent and (b) age dependent mortality rate among males using Selection (FCB and  
 591 FSB) and Treatment (cold-shock and no-shock) as fixed factors crossed with random block  
 592 (1-5). *p*-values in bold are statistically significant.

593

| Trait | Effect | SS | MS Num | DF Num | DF Den | <i>F</i> ratio | <i>p</i> |
|-------|--------|----|--------|--------|--------|----------------|----------|
|-------|--------|----|--------|--------|--------|----------------|----------|



|             |                 |                      |                      |       |                    |                    |                  |
|-------------|-----------------|----------------------|----------------------|-------|--------------------|--------------------|------------------|
| (a) Male    | Selection (Sel) | 0.479                | 0.479                | 1.000 | 4.021              | 2.920              | 0.162            |
| age         | Treatment (Trt) | 9.979                | 9.979                | 1.000 | 4.021              | 61.398             | <b>0.001</b>     |
| independent | Block (Blk)     | 8.791                | 2.198                | 4.000 | 0.008              | 126.988            | 0.960            |
| Mortality   | Sel × Trt       | 0.127                | 0.127                | 1.000 | 4.011              | 0.410              | 0.557            |
|             | Sel × Blk       | 0.656                | 0.164                | 4.000 | 4.000              | 0.531              | 0.723            |
|             | Trt × Blk       | 0.649                | 0.162                | 4.000 | 4.000              | 0.525              | 0.726            |
|             | Sel × Trt × Blk | 1.236                | 0.309                | 4.000 | 39.00              | 1.220              | 0.318            |
| (b) Male    | Selection (Sel) | $3.9 \times 10^{-5}$ | $3.9 \times 10^{-5}$ | 1.000 | 4.017              | 0.340              | 0.591            |
| age         | Treatment (Trt) | $7.3 \times 10^{-3}$ | $7.3 \times 10^{-3}$ | 1.000 | 4.030              | 112.215            | <b>&lt;0.001</b> |
| dependent   | Block (Blk)     | $1.4 \times 10^{-3}$ | $3.5 \times 10^{-4}$ | 4.000 | $9 \times 10^{-6}$ | 3470.59            | 1.000            |
| Mortality   | Sel × Trt       | $1.8 \times 10^{-9}$ | $1.8 \times 10^{-9}$ | 1.000 | 4.011              | $1 \times 10^{-5}$ | 0.998            |
|             | Sel × Blk       | $4.6 \times 10^{-4}$ | $1.1 \times 10^{-4}$ | 4.000 | 4.000              | 0.638              | 0.663            |
|             | Trt × Blk       | $2.6 \times 10^{-4}$ | $6.4 \times 10^{-5}$ | 4.000 | 4.000              | 0.362              | 0.825            |
|             | Sel × Trt × Blk | $7.1 \times 10^{-4}$ | $1.8 \times 10^{-4}$ | 4.000 | 39.00              | 1.251              | 0.305            |

594

595

596

597

598

599

600

601

602 **Table 1d.** Effect of cold-shock on the age independent and age dependent mortality rates of  
 603 females (Experiment 1.1). Summary of results from a three-way mixed model ANOVA on (c)  
 604 age independent and (d) age dependent mortality rate among females using selection (FCB  
 605 and FSB) and treatment (cold-shock and no-shock) as fixed factors crossed with random  
 606 block (1-5).

607

| Trait | Effect | SS | MS Num | DF Num | DF Den | F ratio | P |
|-------|--------|----|--------|--------|--------|---------|---|
|-------|--------|----|--------|--------|--------|---------|---|

|             |                 |                      |                      |       |        |       |       |
|-------------|-----------------|----------------------|----------------------|-------|--------|-------|-------|
| (c) Female  | Selection (Sel) | 0.005                | 0.005                | 1.000 | 4.008  | 0.014 | 0.913 |
| age         | Treatment (Trt) | 0.240                | 0.240                | 1.000 | 4.007  | 0.597 | 0.483 |
| independent | Block (Blk)     | 0.600                | 0.150                | 4.000 | 1.491  | 0.366 | 0.822 |
| Mortality   | Sel × Trt       | 0.092                | 0.092                | 1.000 | 4.008  | 0.245 | 0.647 |
|             | Sel × Blk       | 1.534                | 0.384                | 4.000 | 4.000  | 1.019 | 0.493 |
|             | Trt × Blk       | 1.611                | 0.403                | 4.000 | 4.000  | 1.07  | 0.475 |
|             | Sel × Trt × Blk | 1.505                | 0.376                | 4.000 | 39.000 | 1.74  | 0.161 |
| (d) Female  | Selection (Sel) | $1.4 \times 10^{-4}$ | $1.5 \times 10^{-4}$ | 1.000 | 4.008  | 0.904 | 0.395 |
| age         | Treatment (Trt) | $5.2 \times 10^{-4}$ | $5.1 \times 10^{-4}$ | 1.000 | 4.012  | 4.646 | 0.097 |
| dependent   | Block (Blk)     | $6.9 \times 10^{-4}$ | $1.7 \times 10^{-4}$ | 4.000 | 1.536  | 1.204 | 0.532 |
| Mortality   | Sel × Trt       | $1.3 \times 10^{-4}$ | $1.3 \times 10^{-4}$ | 1.000 | 4.010  | 1.038 | 0.366 |
|             | Sel × Blk       | $6.4 \times 10^{-4}$ | $1.6 \times 10^{-4}$ | 4.000 | 4.000  | 1.265 | 0.413 |
|             | Trt × Blk       | $4.4 \times 10^{-4}$ | $1.1 \times 10^{-4}$ | 4.000 | 4.000  | 0.871 | 0.552 |
|             | Sel × Trt × Blk | $5.1 \times 10^{-4}$ | $1.3 \times 10^{-4}$ | 4.000 | 39.000 | 1.355 | 0.267 |

608

609

610

611

612

613

614

615

616

617 **Table 2.** Effect of cold shock on life time fecundity (Experiment 1.2). Summary of results  
 618 from a three-factor mixed model ANOVA on the life time fecundity using selection (FCB  
 619 and FSB) and treatment (cold-shock and no-shock) as fixed factors crossed with random  
 620 block (1-5).

621

| Effect          | SS    | MS Num | DF Num | DF Den | F ratio | p            |
|-----------------|-------|--------|--------|--------|---------|--------------|
| Selection (Sel) | 0.006 | 0.006  | 1      | 4.001  | 0.004   | 0.955        |
| Treatment (Trt) | 4.264 | 4.264  | 1      | 4.009  | 24.427  | <b>0.007</b> |

|                 |        |       |   |       |       |              |
|-----------------|--------|-------|---|-------|-------|--------------|
| Block (Blk)     | 13.135 | 3.284 | 4 | 1.650 | 2.639 | 0.328        |
| Sel × Trt       | 0.017  | 0.017 | 1 | 4.002 | 0.023 | 0.886        |
| Sel × Blk       | 7.161  | 1.790 | 4 | 4     | 2.485 | 0.199        |
| Trt × Blk       | 0.698  | 0.174 | 4 | 4     | 0.242 | 0.901        |
| Sel × Trt × Blk | 2.881  | 0.720 | 4 | 39    | 5.699 | <b>0.001</b> |

622

623

624

625 **Table 3a.** Effect of cold-shock on parents on the male developmental time (larvae to adult  
 626 eclosion) (Experiment 2). Summary of results from a three-factor mixed model ANOVA on  
 627 the mean larva to adult development time of males using selection (FCB and FSB) and  
 628 treatment (cold-shock and no-shock) as fixed factors crossed with random block (1-5). *p*-  
 629 values in bold are statistically significant.

630

| <b>Effect</b>   | <b>SS</b> | <b>MS Num</b> | <b>DF Num</b> | <b>DF Den</b> | <b>F ratio</b> | <b>p</b>     |
|-----------------|-----------|---------------|---------------|---------------|----------------|--------------|
| Selection (Sel) | 758.240   | 758.240       | 1.000         | 4.000         | 17.449         | <b>0.014</b> |
| Treatment (Trt) | 214.335   | 214.335       | 1.000         | 4.000         | 0.601          | 0.482        |
| Block (Blk)     | 141.786   | 35.446        | 4.000         | 3.993         | 0.098          | 0.977        |
| Sel × Trt       | 54.776    | 54.776        | 1.000         | 4.000         | 1.404          | 0.302        |
| Sel × Blk       | 173.816   | 43.454        | 4.000         | 4.000         | 1.114          | 0.460        |
| Trt × Blk       | 1427.513  | 356.878       | 4.000         | 4.000         | 9.150          | <b>0.027</b> |
| Sel × Trt × Blk | 156.012   | 39.003        | 4.000         | 180.000       | 1.111          | 0.353        |

631

632 **Table 3b.** Effect of cold-shock on parent on the female developmental time (larvae to adult  
 633 eclosion) (Experiment 2). Summary of results from a three-factor mixed model ANOVA on  
 634 mean larva to adult development time of females using selection (FCB and FSB) and  
 635 treatment (cold-shock and no-shock) as fixed factors crossed with random block (1-5). *p*-  
 636 values in bold are statistically significant.

637

| <b>Effect</b>   | <b>SS</b> | <b>MS Num</b> | <b>DF Num</b> | <b>DF Den</b> | <b>F ratio</b> | <b>p</b>     |
|-----------------|-----------|---------------|---------------|---------------|----------------|--------------|
| Selection (Sel) | 907.888   | 907.888       | 1.000         | 4.000         | 8.374          | <b>0.044</b> |

|                 |          |         |       |         |       |       |
|-----------------|----------|---------|-------|---------|-------|-------|
| Treatment (Trt) | 206.835  | 206.835 | 1.000 | 4.000   | 0.453 | 0.538 |
| Block (Blk)     | 950.196  | 237.549 | 4.000 | 1.019   | 0.855 | 0.658 |
| Sel × Trt       | 204.729  | 204.729 | 1.000 | 4.000   | 0.712 | 0.446 |
| Sel × Blk       | 433.683  | 108.421 | 4.000 | 4.000   | 0.377 | 0.816 |
| Trt × Blk       | 1828.026 | 457.007 | 4.000 | 4.000   | 1.590 | 0.332 |
| Sel × Trt × Blk | 1149.930 | 287.483 | 4.000 | 180.000 | 1.840 | 0.123 |

638

639

640 **Table 4a.** Effect of cold-shock on the dry body weight of male (Experiment 3). Summary of  
 641 results from a three-factor mixed model ANOVA on the mean dry body weight of males  
 642 using selection (FCB and FSB) and treatment (cold-shock and no-shock) as fixed factors  
 643 crossed with random block (1-5). *p*-values in bold are statistically significant.

644

| Effect          | SS                   | MS Num               | DF Num | DF Den  | <i>F</i> ratio | <i>p</i>     |
|-----------------|----------------------|----------------------|--------|---------|----------------|--------------|
| Selection (Sel) | 8.2×10 <sup>-5</sup> | 8.2×10 <sup>-5</sup> | 1.000  | 4.000   | 0.178          | 0.694        |
| Treatment (Trt) | 7×10 <sup>-4</sup>   | 7×10 <sup>-4</sup>   | 1.000  | 4.000   | 0.701          | 0.450        |
| Block (Blk)     | 6×10 <sup>-3</sup>   | 1.5×10 <sup>-3</sup> | 4.000  | 6.553   | 1.050          | 0.450        |
| Sel × Trt       | 1.2×10 <sup>-5</sup> | 1.2×10 <sup>-5</sup> | 1.000  | 4.000   | 0.240          | 0.650        |
| Sel × Blk       | 1.8×10 <sup>-3</sup> | 4.6×10 <sup>-4</sup> | 4.000  | 4.000   | 9.550          | <b>0.025</b> |
| Trt × Blk       | 4×10 <sup>-3</sup>   | 1×10 <sup>-3</sup>   | 4.000  | 4.000   | 20.974         | <b>0.006</b> |
| Sel × Trt × Blk | 2×10 <sup>-4</sup>   | 4.8×10 <sup>-5</sup> | 4.000  | 180.000 | 0.145          | 0.965        |

645

646

647

648

649 **Table 4b.** Effect of cold shock on the dry body weight of female (Experiment 3). Summary of  
 650 results from a three-factor mixed model ANOVA on the mean dry body weight of females  
 651 using selection (FCB and FSB) and treatment (cold-shock and no-shock) as fixed factors  
 652 crossed with random Blocks (1-5). *p*-values in bold are statistically significant.

653

| Effect          | SS                   | MS Num               | DF Num | DF Den | <i>F</i> ratio | <i>p</i>     |
|-----------------|----------------------|----------------------|--------|--------|----------------|--------------|
| Selection (Sel) | 6.7×10 <sup>-3</sup> | 6.7×10 <sup>-3</sup> | 1.000  | 4.000  | 32.942         | <b>0.005</b> |

|                               |                      |                      |       |         |       |       |
|-------------------------------|----------------------|----------------------|-------|---------|-------|-------|
| Treatment (Trt)               | $3 \times 10^{-4}$   | $3 \times 10^{-4}$   | 1.000 | 4.000   | 0.287 | 0.621 |
| Block (Blk)                   | $1.4 \times 10^{-2}$ | $3.4 \times 10^{-3}$ | 4.000 | 3.756   | 3.620 | 0.128 |
| Sel $\times$ Trt              | $2 \times 10^{-4}$   | $2 \times 10^{-4}$   | 1.000 | 4.000   | 1.199 | 0.335 |
| Sel $\times$ Blk              | $8 \times 10^{-4}$   | $2 \times 10^{-4}$   | 4.000 | 4.000   | 1.059 | 0.479 |
| Trt $\times$ Blk              | $3.7 \times 10^{-3}$ | $9 \times 10^{-4}$   | 4.000 | 4.000   | 4.828 | 0.078 |
| Sel $\times$ Trt $\times$ Blk | $8 \times 10^{-4}$   | $2 \times 10^{-5}$   | 4.000 | 180.000 | 0.491 | 0.743 |

654

655

656

657 **Table 5.** Effect of cold shock on the larvae to adults survivals (Experiment 4). Summary of  
 658 results from a three-factor mixed model ANOVA on the mean larvae to adults survivals  
 659 considering selection (FCB and FSB) and treatment (cold-shock and no-shock) as fixed  
 660 factors crossed with random Blocks (1-5). *p*-values in bold are statistically significant.

661

662

| Effect                        | SS       | MS      |     | DF Num | DF den | F Ratio | Prob > F |
|-------------------------------|----------|---------|-----|--------|--------|---------|----------|
|                               |          | Num     | Den |        |        |         |          |
| Selection (Sel)               | 37.556   | 37.556  |     | 1      | 4      | 2.449   | 0.193    |
| Treatment (Trt)               | 128.000  | 128.000 |     | 1      | 4      | 3.578   | 0.132    |
| Block (Blk)                   | 1270.889 | 317.722 |     | 4      | 1.918  | 10.417  | 0.096    |
| Sel $\times$ Trt              | 107.556  | 107.556 |     | 1      | 4      | 5.218   | 0.084    |
| Sel $\times$ Blk              | 61.333   | 15.333  |     | 4      | 4      | 0.744   | 0.609    |
| Trt $\times$ Blk              | 143.111  | 35.778  |     | 4      | 4      | 1.736   | 0.303    |
| Sel $\times$ Trt $\times$ Blk | 82.444   | 20.611  |     | 4      | 180    | 1.013   | 0.402    |

663

664

665

666

667

668

669

670

671

672

673

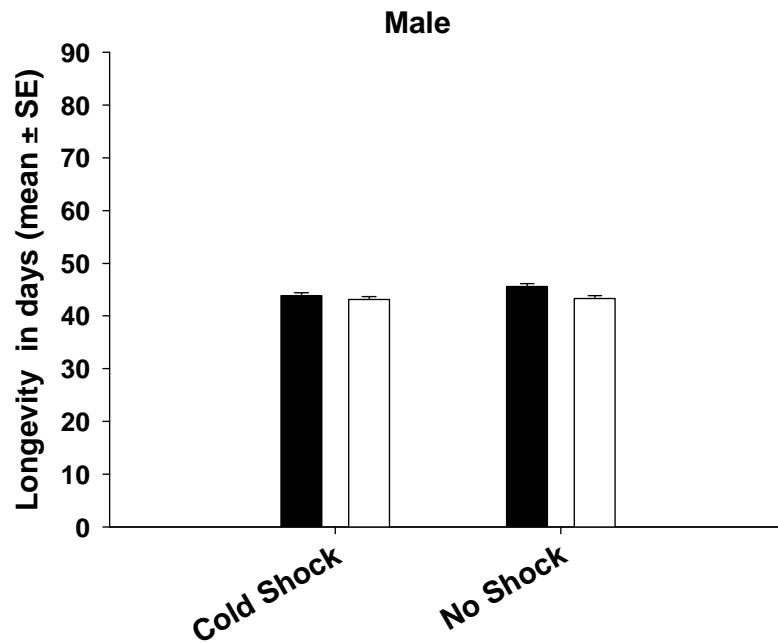

674

675 **Figure 1a:** Mean longevity of the FSB and FCB males after being subjected to cold-shock or  
676 no-shock treatment (Experiment 1.1). Selection, treatment or selection  $\times$  treatment interaction  
677 did not have significant effect on male mean longevity. Open bars represent the FSB and  
678 closed bars represent the FCB populations.

679

680

681

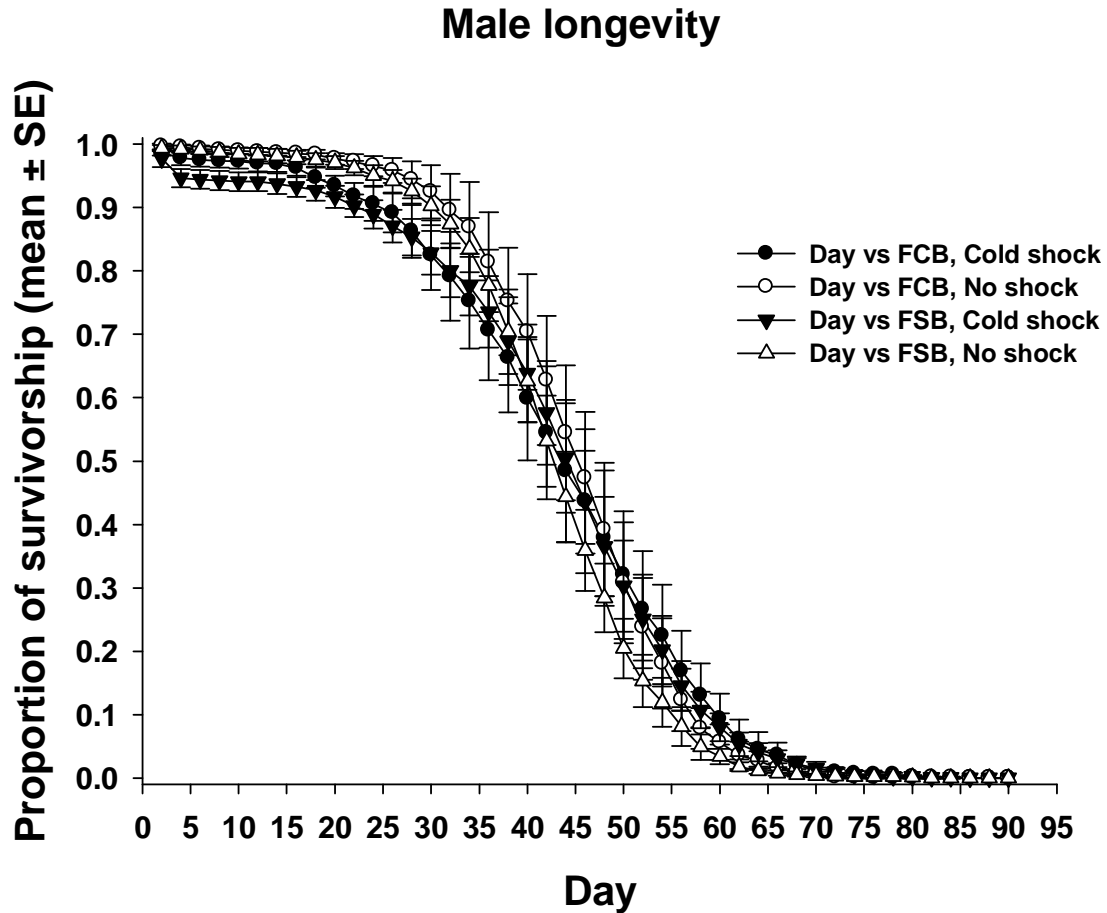

682  
683

684 **Figure 1b:** Male survivorship across ages (Experiment 1.1). Longevity was assayed after  
685 adult flies were subjected to cold-shock or no-shock treatment. There was no difference in the  
686 mean, median and maximum longevity of the FSB and FCB males. There was no significant  
687 difference in the *Gompertz* parameters between the FSB and FCB populations.

688

689

690

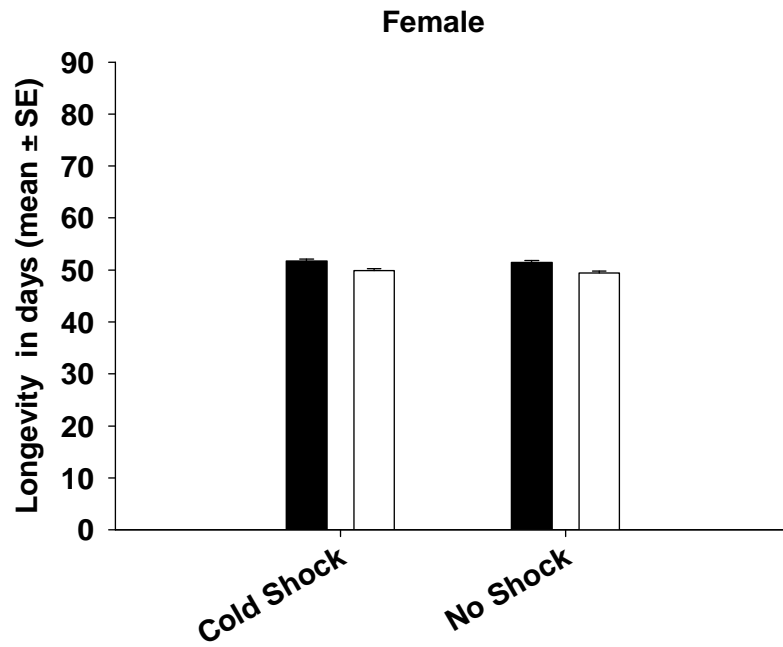

691

692 **Figure 1c:** Mean longevity of the FSB and FCB females after being exposed to cold shock or  
693 no shock treatment (Experiment 1.1). Selection, treatment or selection  $\times$  treatment interaction  
694 did not have significant effect on female mean longevity. Open bars represent the FSB and  
695 closed bars represent the FCB populations.

696

697

698



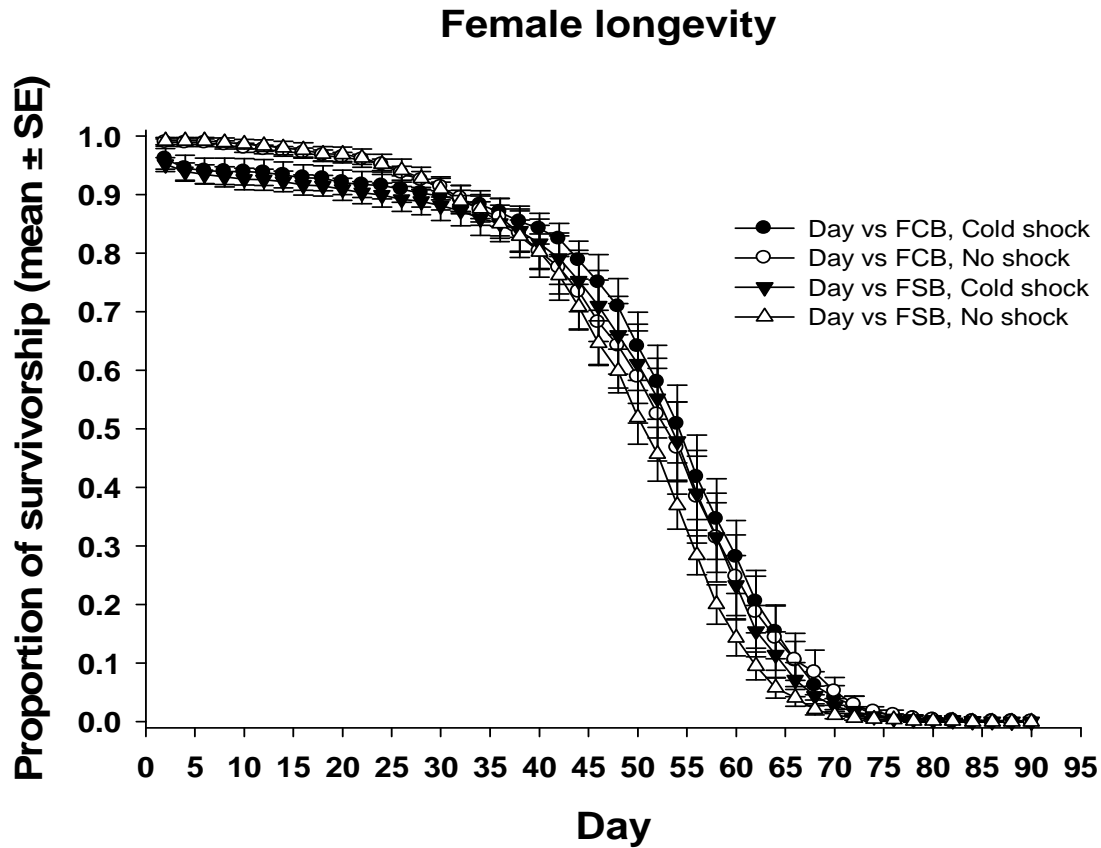

699  
700

701 **Figure 1d:** Female survivorship across ages (Experiment 1.1). Longevity was assayed after  
702 adult flies were subjected to cold-shock or no-shock treatment. There was no difference in the  
703 mean, median and maximum longevity of the FSB and FCB females. There was no  
704 significant difference in the *Gompertz* parameters between FSB and FCB populations.

705

706

707

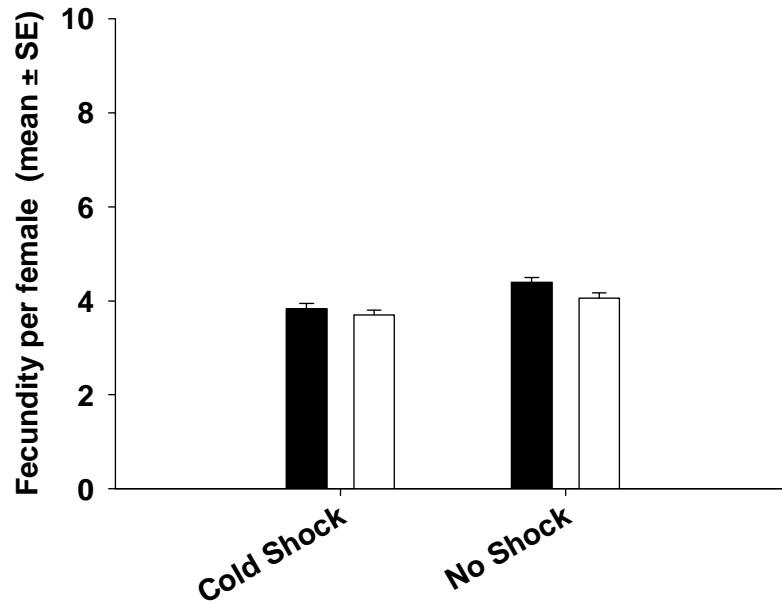

708

709 **Figure 2a:** Mean life time fecundity per female (Experiment 1.2). Fecundity was measured at  
710 eleven time points once in every 6 days and mean of eleven time points for fecundity was  
711 computed. Selection, treatment or selection  $\times$  treatment interaction did not have significant  
712 effect on fecundity. Open bars represent the FSB populations and closed bars represent the  
713 FCB populations.

714

715

716

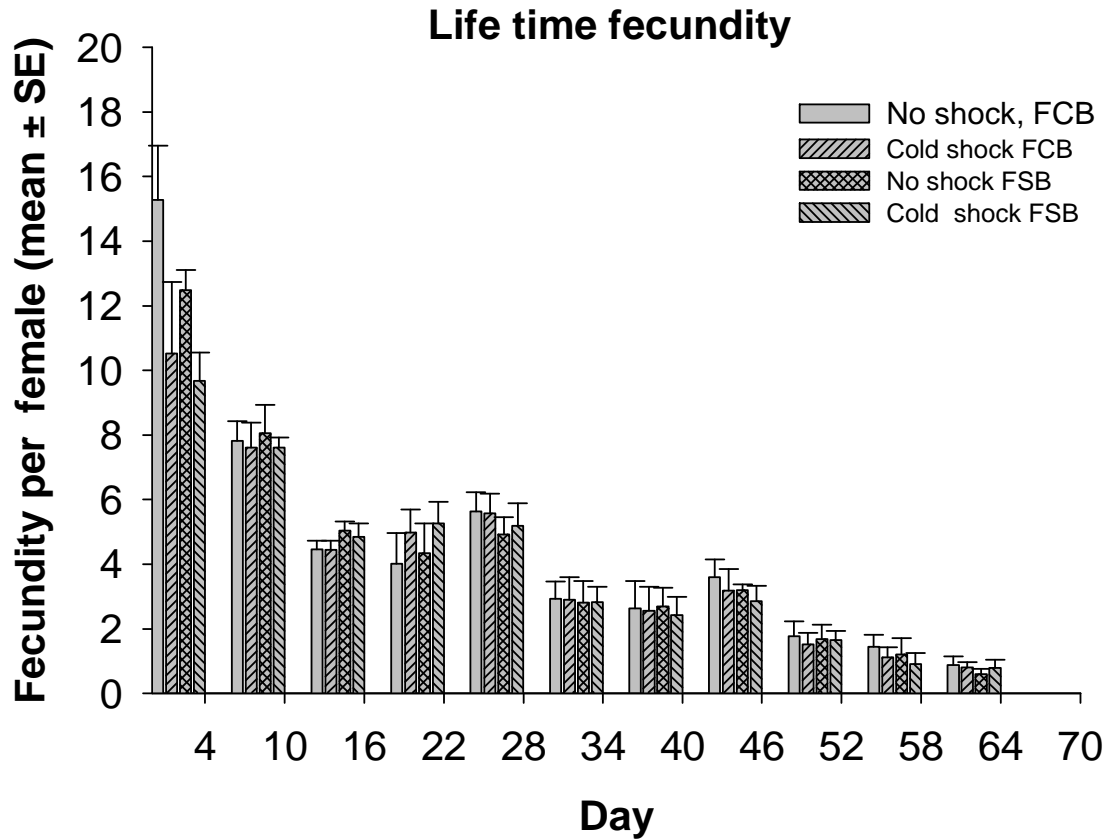

717  
718

719 **Figure 2b:** Life time fecundity per female (Experiment 1.2). Fecundity was measured at  
720 eleven time points once in every 6 days. Mean fecundity per female for each population and  
721 treatment was computed for eleven time points. Results indicate that fecundity reduces with  
722 age. However, none of the other effects were significant.

723

724

725

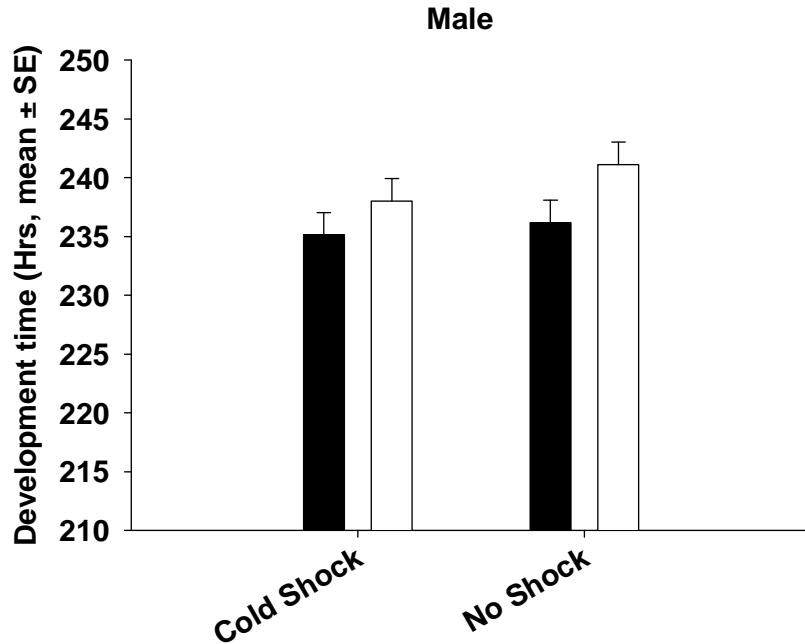

726

727

728 **Figure 3a:** Mean development time (larva to adult) of the FSB and FCB males when their  
729 parents were subjected cold-shock or no-shock treatments (Experiment 2). We found a  
730 significant effect of selection regime with the FSB males developing 3-4 hours slower than  
731 FCB males. Treatment had no significant effect. Open bars represent the FSB populations  
732 and closed bars represent the FCB populations.

733

734

735

736

737

738

739

740

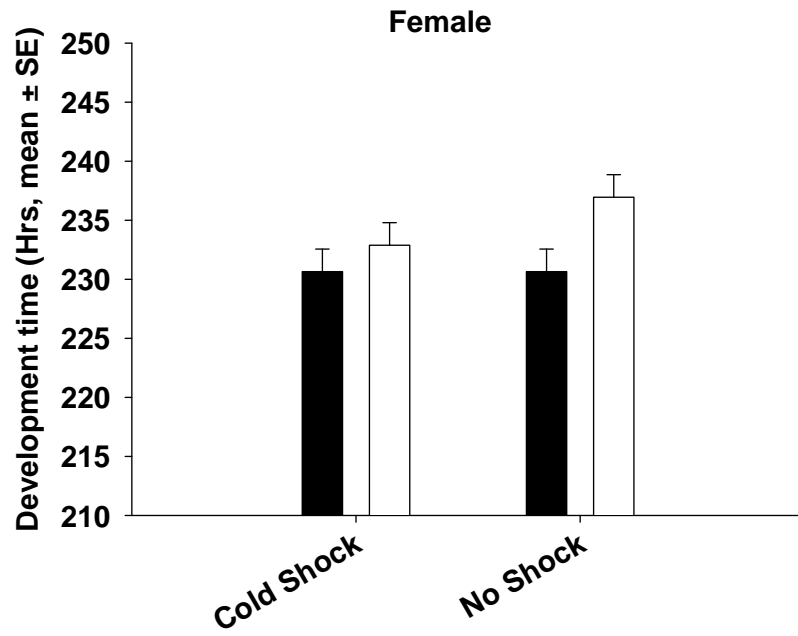

741

742

743

744

745

746

747

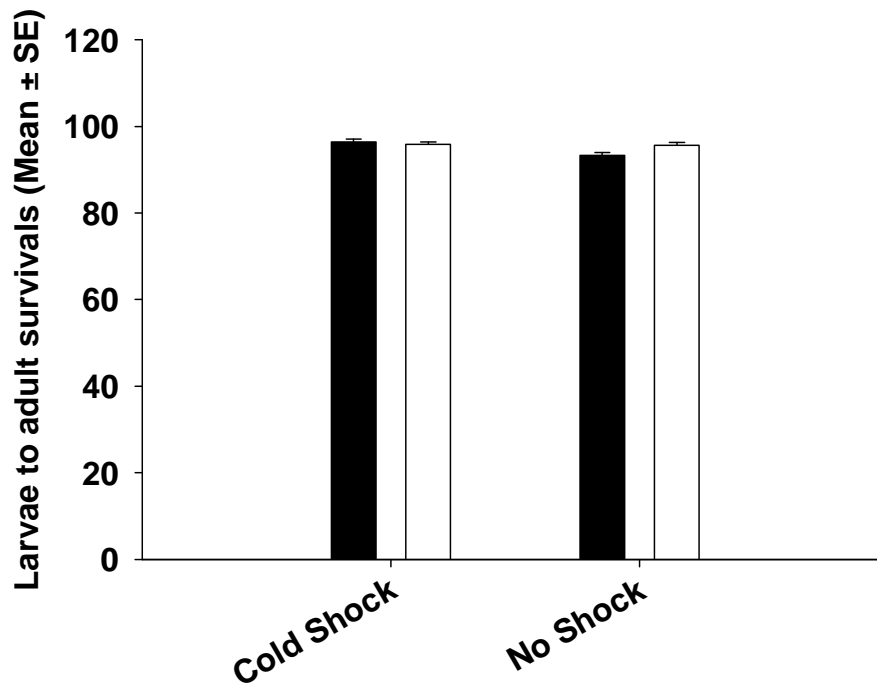

748

749 **Figure 3b:** Mean development time (larva to adult) of the FSB and FCB females when their  
750 parents were subjected cold-shock or no-shock treatments (Experiment 2). We found a  
751 significant effect of Selection regime with FSB females developing 3-4 hours slower than  
752 FCB females. Treatment had no significant effect. Open bars represent the FSB populations  
753 and closed bars represent the FCB populations.

754

755

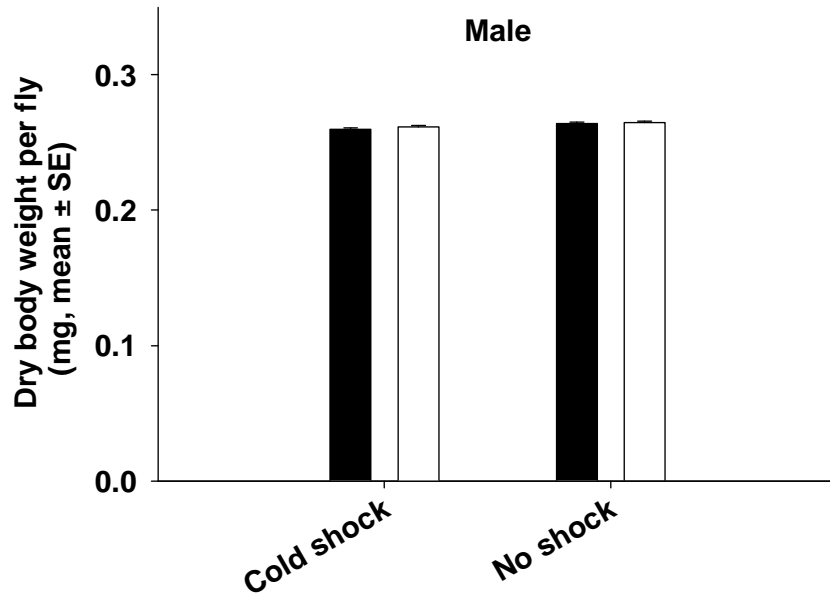

756

757 **Figure 4a:** Dry weight at eclosion of males from the FSB and FCB populations (Experiment  
758 3). Selection, treatment or selection  $\times$  treatment interaction did not have significant effect on  
759 mean dry body weight. Open bars represent the FSB and closed bar represent the FCB  
760 populations.

761

762

763

764

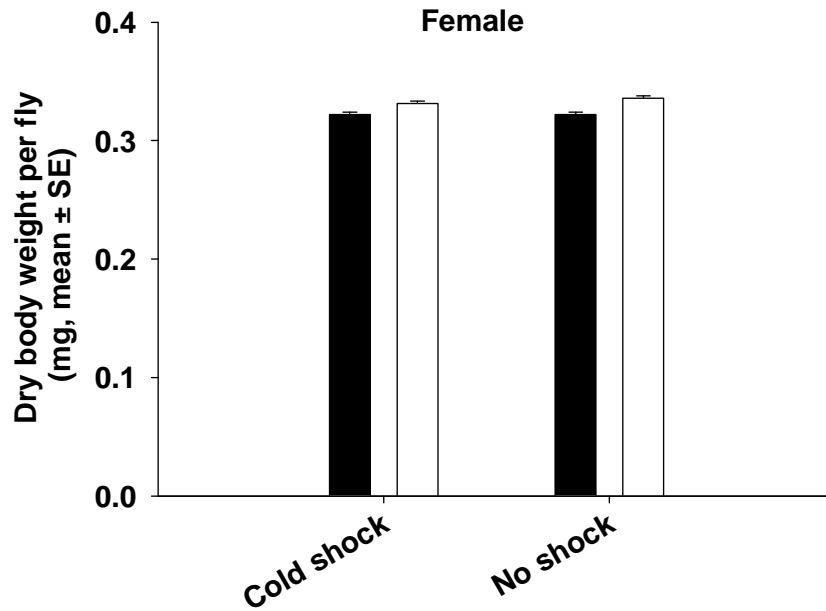

765

766 **Figure 4b:** Dry weight at eclosion of females from the FSB and FCB populations. Selection  
767 had significant effect on mean dry body weight (Experiment 3). However, treatment or  
768 selection × treatment did not have significant effects on mean dry body weight. Open bars  
769 represent the FSB and closed bar represent the FCB populations.

770

771

772

773

774

775

776



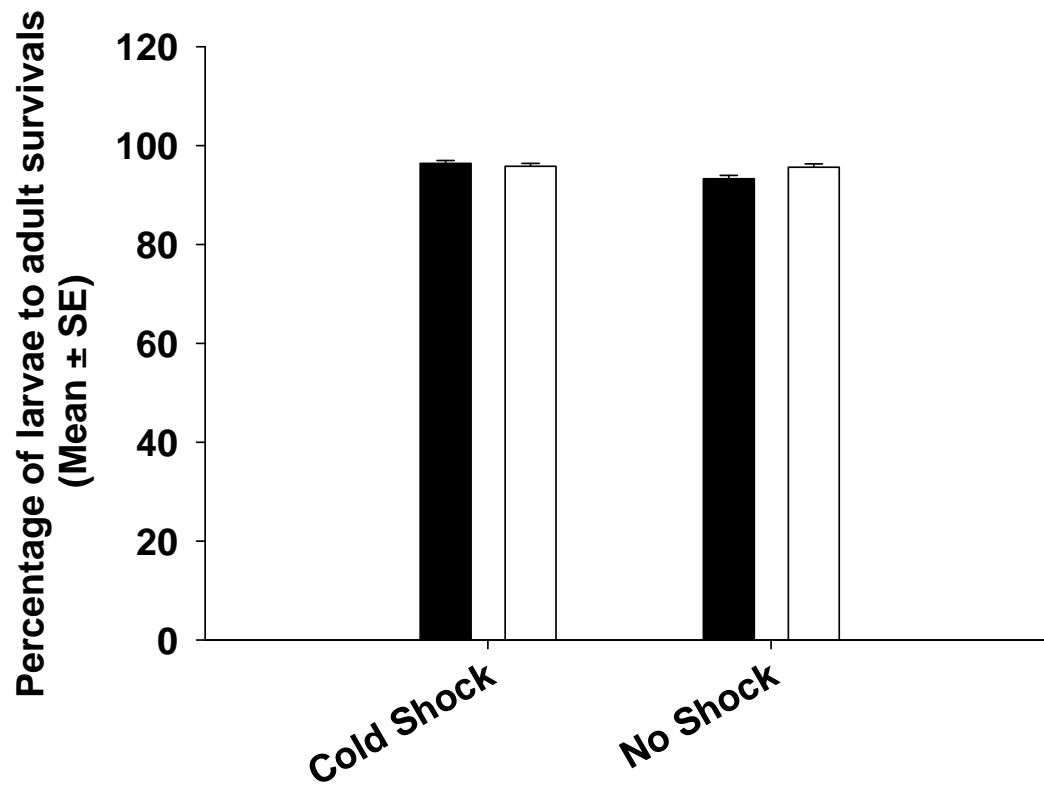

777

778

779 **Figure 5:** Larvae to adults survival from the FSB and FCB populations (Experiment 4).

780 Selection, treatment or selection × treatment did not have any significant effects on mean

781 larvae to adult survivals. Open bars represent the FSB and closed bar represent the FCB

782 populations

783

784
